# Supplementary material for: Morbidity and Mortality Conference in Emergency Medicine Residencies and the Culture of Safety
Source: PubMed Central journal article supplement (PMC4651575; doi:10.5811/westjem.2015.8.26559), 2015-10-22
Supplement: wjem-16-810-s001.pdf [file wjem-16-810-s001.pdf]

## ORGANIZATION AND INFRASTRUCTURE

1. What is your primary role in the Emergency Department?

- Residency Administration
- ED Quality or Safety Administration
- ED Director or Operations Administration
- Department Chief
- Attending with no formal Administrative title

2. How often does your residency program hold M&M conference?\*

\*If multiple sites, please include all clinical sites when determining frequency

- Weekly
- Bi-weekly (every other week)
- Monthly
- Less than once monthly

3. How long is M&M conference?

- Shorter than 1 hour
- 1 hour
- 2 hours
- Longer than 2 hours

#### 4. What is the objective of M&M?

Drag and drop the following choices in order of preference, with your top choice in the first position.

|                          |                                                             |
|--------------------------|-------------------------------------------------------------|
| <input type="checkbox"/> | Discuss adverse outcomes [e.g. patient deaths/readmissions] |
| <input type="checkbox"/> | Identify systems errors                                     |
| <input type="checkbox"/> | Identify cognitive errors                                   |
| <input type="checkbox"/> | Teach individual professional accountability                |
| <input type="checkbox"/> | Discuss interesting cases                                   |
| <input type="checkbox"/> | Other:                                                      |

### CASE FINDING

#### 5. How are cases for M&M identified?

Check all that apply

- Email from providers
- Hospital's patient safety reporting system
- Referred from risk management
- Regular review of deaths in the ED
- Regular review of deaths after admission
- Regular review of return visits

Other Triggers:

#### 6. Is there a method of submitting cases anonymously for M&M?

- Yes
- No

### CASE SELECTION

7. What criteria are used to decide which cases are presented?

Rank in order of importance

|                          |                                                     |
|--------------------------|-----------------------------------------------------|
| <input type="checkbox"/> | Severity of Outcome                                 |
| <input type="checkbox"/> | Case involves errors, regardless of patient outcome |
| <input type="checkbox"/> | Referred by another department for presentation     |
| <input type="checkbox"/> | Interesting nature of disease                       |

8. Who decides which cases are presented?

- Resident presenting conference
- Attending supervising conference
- Joint decision of resident and attending

Other (please specify)

9. Who is in charge of overseeing the M&M process?

- Program director
- Associate/Assistant program director
- Director of Quality
- Other faculty

Other (please specify)

**PRESENTATION**

10. Who presents the cases at M+M?

- Resident involved in patient's care
- Resident who presents entire conference (not involved in patient's care)
- Faculty involved in patient's care
- Faculty not involved

Other (please specify)

\* 11. Please check the frequency of the following activities or events:

|                                                                                               | Never                 | Rarely                | Frequently            | Always                |
|-----------------------------------------------------------------------------------------------|-----------------------|-----------------------|-----------------------|-----------------------|
| Attendings that are involved in cases are identified by name by the presenters                | <input type="radio"/> | <input type="radio"/> | <input type="radio"/> | <input type="radio"/> |
| Residents that are involved in cases are identified by name by presenters                     | <input type="radio"/> | <input type="radio"/> | <input type="radio"/> | <input type="radio"/> |
| Clinicians that are involved in cases are present at M+M                                      | <input type="radio"/> | <input type="radio"/> | <input type="radio"/> | <input type="radio"/> |
| Attendings that are involved in cases are asked to comment on the case                        | <input type="radio"/> | <input type="radio"/> | <input type="radio"/> | <input type="radio"/> |
| Residents that are involved in cases are asked to comment on the case                         | <input type="radio"/> | <input type="radio"/> | <input type="radio"/> | <input type="radio"/> |
| Analysis of systems errors contributing to each case is performed as a part of M+M conference | <input type="radio"/> | <input type="radio"/> | <input type="radio"/> | <input type="radio"/> |

**FOLLOW UP**

12. Is there a single individual responsible for following up on systems issues identified at M+M?

- Yes
- No

13. Is there a formalized process for following up on systems issues identified at M+M?

Yes

No

14. Are changes that are made reported back to residents?

Yes, at a future M&M

Yes, by other methods (e.g. email)

Not regularly

15. Do you believe systems issues identified in M&M conference lead to change in your emergency department?

Always

Sometimes

Never

16. Is there regular debriefing for residents who have their cases discussed at M&M?

Yes, by a member of residency administration

Yes, by chief resident

Yes, by someone else

No

17. Is M&M formally evaluated by Attendings?

Yes

No

18. Is M&M formally evaluated by Residents?

Yes

No

19. Please rank the following statements

|                                                            | Strongly Disagree     | Disagree              | Neutral               | Agree                 | Strongly Agree        |
|------------------------------------------------------------|-----------------------|-----------------------|-----------------------|-----------------------|-----------------------|
| The Residents find M&M to be of educational value          | <input type="radio"/> | <input type="radio"/> | <input type="radio"/> | <input type="radio"/> | <input type="radio"/> |
| Case discussion is focused on cognitive errors             | <input type="radio"/> | <input type="radio"/> | <input type="radio"/> | <input type="radio"/> | <input type="radio"/> |
| Case discussion is focused on identifying systems errors   | <input type="radio"/> | <input type="radio"/> | <input type="radio"/> | <input type="radio"/> | <input type="radio"/> |
| M&M contributes to the culture of safety at my institution | <input type="radio"/> | <input type="radio"/> | <input type="radio"/> | <input type="radio"/> | <input type="radio"/> |
